# Supplementary material for: Assessing Greenhouse Gas Emissions and Health Co-Benefits: A Structured Review of Lifestyle-Related Climate Change Mitigation Strategies
Source: Int J Environ Res Public Health. 2017 Apr 27;14(5):468. doi: 10.3390/ijerph14050468 (PMC5451919; doi:10.3390/ijerph14050468)
Supplement: Supplementary file 1 [file ijerph-14-00468-s001.pdf]

# Assessing Greenhouse Gas Emissions and Health Co-Benefits: A Structured Review of Lifestyle-Related Climate Change Mitigation Strategies

Vivian G.M. Quam, Joacim Rocklöv, Mikkel B.M. Quam and Rebekah A. I. Lucas

Table S1. Summary of reviewed articles and their measured outcomes.

| Article                                                  | Geography                       | Modeled or observational data                                                                    | Health outcome                                                                                                                                                    | GHG/emission outcome                                                                                                                                                                                                                                                 |
|----------------------------------------------------------|---------------------------------|--------------------------------------------------------------------------------------------------|-------------------------------------------------------------------------------------------------------------------------------------------------------------------|----------------------------------------------------------------------------------------------------------------------------------------------------------------------------------------------------------------------------------------------------------------------|
| Lifestyle-Related Mitigation Strategy – ACTIVE TRANSPORT |                                 |                                                                                                  |                                                                                                                                                                   |                                                                                                                                                                                                                                                                      |
| Grabow <i>et al.</i> 2012                                | Midwest US (urban and suburban) | Modeled elimination of short car trips, replacing 50% of trips <= 8Km by bike                    | BenMAP estimated health impact due to CMAQ-simulated changes in ambient air pollution. Monetized all-cause mortality using HEAT                                   | PM and Ozone using CMAQ model. Modeled changes in primary emissions (NO <sub>x</sub> , CO, sulfur dioxide, ammonia, VOCs, elemental and organic carbon, fine and coarse PM) as well as emissions from evaporation, brake dust, re-suspended road dust. And refueling |
| Lindsay <i>et al.</i> 2011                               | New Zealand                     | Modeled scenarios where bike trips replaced short car trips (<7km) at different rates            | Mortality from PA, air pollution, and traffic accidents. Monetized.                                                                                               | CO <sub>2</sub> eq emissions                                                                                                                                                                                                                                         |
| Macmillan <i>et al.</i> 2014                             | Auckland, New Zealand           | Modeled scenarios for injury, physical activity, fuel costs, air pollution, and carbon emissions | For adults > 30: death, cardio and resp hospitalization due to PM and CO. Monetized all-cause mortality due to cycling change.                                    | Monetized carbon emissions in CO <sub>2</sub> eq, including CO <sub>2</sub> , CO, CH <sub>4</sub> , and NO <sub>x</sub>                                                                                                                                              |
| Maizlish <i>et al.</i> 2013                              | San Francisco Bay Area, CA      | Modeled scenarios for travel mode shift from car to AT                                           | DALYS due to physical activity, air pollution and traffic accidents. DALYs due to cardio disease, diabetes, dementia, breast cancer, colon cancer, and depression | Greenhouse Gas Emissions                                                                                                                                                                                                                                             |
| Michaelowa & Dransfeld 2008                              | Global                          | Models shift of 2.5 km /person /day from motorized to                                            | Reduced obesity                                                                                                                                                   | CO <sub>2</sub> eq emissions                                                                                                                                                                                                                                         |

|                                              |                             |                                                                                                                                           |                                                                                                                                    |                                                                       |
|----------------------------------------------|-----------------------------|-------------------------------------------------------------------------------------------------------------------------------------------|------------------------------------------------------------------------------------------------------------------------------------|-----------------------------------------------------------------------|
|                                              |                             | non-motorized transport                                                                                                                   |                                                                                                                                    |                                                                       |
| Rabl & de Nazelle 2012                       | Europe                      | Modeled scenarios where car travel to work is replaced by walking for biking                                                              | Mortality from PA, traffic accidents, and pollution. Monetized                                                                     | CO <sub>2</sub> eq emissions monetized                                |
| Rojas-Rueda <i>et al.</i> 2012               | Barcelona, Spain            | Modeled 8 scenarios with varying levels of car, bike and public transport                                                                 | All-cause mortality and change in life expectancy due to PA, air pollution, and traffic. As well as PM for the general population. | CO <sub>2</sub>                                                       |
| Woodcock <i>et al.</i> 2009                  | London, UK and Delhi, India | Modeled scenarios with AT and low emission vehicles and a combination of the two. 4 scenarios compared to BAU.                            | Comparative risk assessment. DALYS due to PA, air pollution (PM 2.5µm or less) and traffic accidents were measured.                | CO <sub>2</sub> emissions from motor vehicle fuel combustion. No LCA. |
| Woodcock <i>et al.</i> 2013                  | England and Wales           | Integrated transport and health impact modeling tool                                                                                      | DALYS for physical activity, air pollution, and traffic accidents using HEAT                                                       | CO <sub>2</sub> emissions                                             |
| Lifestyle-Related Mitigation Strategy – DIET |                             |                                                                                                                                           |                                                                                                                                    |                                                                       |
| Aston <i>et al.</i> 2012                     | UK                          | Modeled conversion of “high meat” diets to “low meat diets”                                                                               | Reduction in risk of coronary heart disease, diabetes, and colorectal cancer                                                       | GHG emissions converted to CO <sub>2</sub> eq                         |
| Berners-Lee <i>et al.</i> 2012               | UK                          | Modeled 6 vegetarian/ vegan diets compared to BAU                                                                                         | Consumption of protein, carbohydrates, added sugar, fat, sodium                                                                    | GHG emissions converted to CO <sub>2</sub> eq                         |
| Biesbroek <i>et al.</i> 2014                 | Netherlands                 | Estimated GHGE and land use from food frequency questionnaire                                                                             | Mortality                                                                                                                          | CO <sub>2</sub> eq                                                    |
| Briggs <i>et al.</i> 2013                    | UK                          | Modeled tax scenarios where food and drink with above average GHG emission are taxed with or without subsidizing those with below average | Deaths averted                                                                                                                     | Emissions in CO <sub>2</sub> eq                                       |
| de Carvalho <i>et al.</i> 2013               | Brazil                      | Estimated GHGE associated with red meat consumption                                                                                       | Consumption of red meat, diet quality                                                                                              | CO <sub>2</sub> eq emissions                                          |
| Edjabou & Smed 2013                          | Denmark                     | Modeled tax scenarios                                                                                                                     | Nutrient consumption including energy, saturated fat, and added sugar                                                              | CO <sub>2</sub> eq emissions                                          |
| Friel <i>et al.</i> 2009                     | UK and Brazil               | Modeled scenarios to achieve 50%                                                                                                          | DALYS from ischemic heart disease and stroke                                                                                       | CO <sub>2</sub> eq                                                    |

|                                  |           |                                                                                                                               |                                                                                                                                                |                                                   |
|----------------------------------|-----------|-------------------------------------------------------------------------------------------------------------------------------|------------------------------------------------------------------------------------------------------------------------------------------------|---------------------------------------------------|
|                                  |           | reduction in emissions in the food and agriculture sector with technology and consumption changes                             |                                                                                                                                                |                                                   |
| González <i>et al.</i> 2011      | Sweden    | Observational data                                                                                                            | G Protein per kg food eaten                                                                                                                    | CO <sub>2</sub> eq and energy inputs per kg food  |
| Hallström <i>et al.</i> 2014     | Sweden    | 2 Modeled dietary scenarios in line with RDI                                                                                  | Dietary nutrients consumed                                                                                                                     | CO <sub>2</sub> eq emissions and land requirement |
| Hendrie <i>et al.</i> 2014       | Australia | Modelled GHGE from average Australian diet and compared to recommended diets                                                  | Cost, nutritional benefit, calories, non-core foods                                                                                            | CO <sub>2</sub> eq emissions                      |
| Hoolohan <i>et al.</i> 2013      | UK        | Modeling reduction of waste, elimination of meat, shift to less intensive meat, or avoiding hot-house and air-freighted foods | Nutrient intake                                                                                                                                | CO <sub>2</sub> eq emissions                      |
| Macdiarmid <i>et al.</i> 2012    | UK        | Database created linking nutrient composition and GHGE data for 82 food groups                                                | Nutrient composition                                                                                                                           | CO <sub>2</sub> eq                                |
| Masset <i>et al.</i> 2014        | France    | Correlations between nutritional value and environmental impact were calculated                                               | SAIN:LIM score nutrient content/recommendation ratio for protein, fiber, calcium, Vit C, and iron against sat fatty acids, added sugar, sodium | GHG emissions, acidification, and eutrophication  |
| Michaelowa & Dransfeld 2008      | Global    | Models shift of 2.5 km /person /day from motorized to non-motorized transport                                                 | Reduced obesity                                                                                                                                | CO <sub>2</sub> eq emissions                      |
| Pairotti <i>et al.</i> (2015)    | Italy     | Modeled diet scenarios; Mediterranean, BAU, healthy, vegetarian                                                               | Energy consumption within food groups                                                                                                          | CO <sub>2</sub> eq emissions                      |
| Saxe <i>et al.</i> 2013          | Denmark   | Compared 3 diets, 2 healthy Nordic diets against average Danish diet adjusted to contain similar energy and protein levels    | Reduce obesity and chronic disease                                                                                                             | CO <sub>2</sub> eq emissions                      |
| Scarborough <i>et al.</i> (2012) | UK        | 3 diet scenarios were modeled and                                                                                             | Mortality from cardiovascular disease                                                                                                          | GHG emissions                                     |

|                                 |             | compared to BAU                                                                                                     | and cancer                                             |                                                                                                                                                                                     |
|---------------------------------|-------------|---------------------------------------------------------------------------------------------------------------------|--------------------------------------------------------|-------------------------------------------------------------------------------------------------------------------------------------------------------------------------------------|
| Tukker <i>et al.</i> (2011)     | Europe      | 3 diet scenarios were modeled according to dietary recommendations                                                  | Nutrient consumption                                   | Abiotic resource depletion, climate change, ozone depletion, human toxicity, ecotoxicity, photochemical oxidant formation, terrestrial acidification, and freshwater eutrophication |
| Van Dooren <i>et al.</i> (2014) | Netherlands | Modeled 6 diets based on health and reduced animal protein consumption                                              | Health score for each diet calculated on 10 indicators | CO <sub>2</sub> eq emissions and land use                                                                                                                                           |
| Vieux <i>et al.</i> (2012)      | France      | Modeled diet scenarios reduced calorie consumption and substituting vegetables for meat                             | Caloric intake                                         | CO <sub>2</sub> eq emissions                                                                                                                                                        |
| Wallén <i>et al.</i> (2004)     | Sweden      | Modeled suggested diets based on food availability                                                                  | Consumption in calories                                | CO <sub>2</sub> eq emissions                                                                                                                                                        |
| Westhoek <i>et al.</i> (2014)   | Europe      | Modeled a halving of meat and dairy consumption                                                                     | Nutrient intake                                        | Nitrogen emissions, GHG, land use                                                                                                                                                   |
| Wilson <i>et al.</i> 2013       | New Zealand | Modeled diet scenarios based on i) low-cost ii) low GHGE and low-cost iii) high vegetable intake iv) familiar meals | Nutrient value                                         | GHG emissions                                                                                                                                                                       |

PM = Particulate Matter; CMAQ = Community Multiscale Air Quality Model; CO = Carbon Monoxide; NO<sub>2</sub> = oxides of nitrogen; VOCs = volatile organic compound; CO<sub>2</sub> eq = Carbon dioxide equivalents; CH<sub>4</sub> = Methane; DALYs = Disability Adjusted Life Years; PM<sub>2.5</sub> = Particulate Matter ≤ 2.5 μm in aerodynamic diameter; AT = Active transport; BAU = Business As Usual; LCA = Life Cycle Analysis; GHG = Greenhouse Gas; GHGE = Greenhouse Gas emission; HEAT = Health Economic Assessment Tool; RDI = Recommended Daily Intake.

**Table S2.** Lifestyle-Related Mitigation Strategy – Diet. Type of dietary change examined in reviewed articles.

| Author                                       | Reduced Meat/Dairy | Other |
|----------------------------------------------|--------------------|-------|
| Lifestyle-Related Mitigation Strategy – DIET |                    |       |
| Aston <i>et al.</i> 2012                     | yes                | no    |
| Berners-Lee <i>et al.</i> 2012               | yes                | no    |
| Biesbroek <i>et al.</i> 2014                 | yes                | no    |
| Briggs <i>et al.</i> 2013                    | yes                | yes   |
| de Carvalho <i>et al.</i> 2013               | yes                | no    |
| Edjabou & Smed 2013                          | yes                | yes   |

|                                |     |     |
|--------------------------------|-----|-----|
| Friel <i>et al.</i> 2009       | yes | no  |
| González <i>et al.</i> 2011    | yes | no  |
| Hallström <i>et al.</i> 2014   | yes | no  |
| Hendrie <i>et al.</i> 2014     | yes | yes |
| Hoolohan <i>et al.</i> 2013    | yes | yes |
| Macdiarmid <i>et al.</i> 2012  | yes | yes |
| Masset <i>et al.</i> 2014      | yes | yes |
| Michaelowa & Dransfeld 2008    | yes | yes |
| Pairotti <i>et al.</i> 2015    | yes | yes |
| Saxe <i>et al.</i> 2013        | yes | yes |
| Scarborough <i>et al.</i> 2012 | yes | no  |
| Tukker <i>et al.</i> 2011      | yes | yes |
| van Dooren <i>et al.</i> 2014  | yes | yes |
| Vieux <i>et al.</i> 2012       | yes | no  |
| Wallén <i>et al.</i> 2004      | yes | no  |
| Westhoek <i>et al.</i> 2014    | yes | no  |
| Wilson <i>et al.</i> 2013      | yes | yes |

**Table S3.** Health score by health outcome for reviewed articles.

| Title                                                      | Caloric | Nutrient              | Morbidity | Mortality | Health score |
|------------------------------------------------------------|---------|-----------------------|-----------|-----------|--------------|
| Lifestyle-Related Mitigation Strategies – ACTIVE TRANSPORT |         |                       |           |           |              |
| Grabow <i>et al.</i> 2012                                  |         |                       | yes       | yes       | 7/10         |
| Lindsay <i>et al.</i> 2011                                 |         |                       | yes       | yes       | 7/10         |
| Macmillan <i>et al.</i> 2014                               |         |                       | yes       | yes       | 7/10         |
| Maizlish <i>et al.</i> 2013                                |         |                       | yes       | yes       | 8/10         |
| Michaelowa & Dransfeld 2008                                | n/a     |                       |           |           | 2/10         |
| Rabl & de Nazelle 2012                                     |         |                       |           | yes       | 6/10         |
| Rojas-Rueda <i>et al.</i> 2012                             |         |                       |           | yes       | 8/10         |
| Woodcock <i>et al.</i> 2009                                |         |                       |           | yes       | 7/10         |
| Woodcock <i>et al.</i> 2013                                |         |                       |           | yes       | 10/10        |
| Lifestyle-Related Mitigation Strategies - DIET             |         |                       |           |           |              |
| Aston <i>et al.</i> 2012                                   |         |                       | yes       |           | 7/10         |
| Berners-Lee <i>et al.</i> 2012                             | yes     | yes                   |           |           | 3/10         |
| Biesbroek <i>et al.</i> 2014                               |         |                       |           | yes       | 3/10         |
| Briggs <i>et al.</i> 2013                                  |         |                       |           | yes       | 9/10         |
| de Carvalho <i>et al.</i> 2013                             | yes     | yes                   |           |           | 3/10         |
| Edjabou & Smed 2013                                        | yes     | yes                   |           |           | 4/10         |
| Friel <i>et al.</i> 2009                                   |         |                       |           | yes       | 10/10        |
| González <i>et al.</i> 2011                                |         | yes<br>(protein only) |           |           | 3/10         |
| Hallström <i>et al.</i> 2014                               | yes     | yes                   |           |           | 7/10         |
| Hendrie <i>et al.</i> 2014                                 | yes     | yes                   |           |           | 3/10         |
| Hoolohan <i>et al.</i> 2013                                | yes     | yes                   |           |           | 4/10         |
| Macdiarmid <i>et al.</i> 2012                              | yes     | yes                   |           |           | 6/10         |
| Masset <i>et al.</i> 2014                                  | yes     | yes                   |           |           | 1/10         |
| Michaelowa & Dransfeld 2008                                | n/a     |                       |           |           | 1/10         |

|                                |     |     |          |
|--------------------------------|-----|-----|----------|
| Pairotti <i>et al.</i> 2015    | yes |     | 2/10     |
| Saxe <i>et al.</i> 2013        | yes | yes | 2/10     |
| Scarborough <i>et al.</i> 2012 |     |     | yes 8/10 |
| Tukker <i>et al.</i> 2011      |     | yes | 4/10     |
| van Dooren <i>et al.</i> 2014  | yes | yes | 6/10     |
| Vieux <i>et al.</i> 2012       | yes |     | 7/10     |
| Wallén <i>et al.</i> 2004      | yes | yes | 4/10     |
| Westhoek <i>et al.</i> 2014    | yes | yes | 4/10     |
| Wilson <i>et al.</i> 2013      | yes | yes | 4/10     |

**Table S4.** Tools for estimating physical activity impact on health in reviewed articles.

| Article                                                  | CRA | HEAT | System dynamics modeling |
|----------------------------------------------------------|-----|------|--------------------------|
| Lifestyle-Related Mitigation Strategy – Active Transport |     |      |                          |
| Grabow <i>et al.</i> 2012                                |     | +    |                          |
| Lindsay <i>et al.</i> 2011                               |     | +    |                          |
| Macmillan <i>et al.</i> 2014                             |     |      | +                        |
| Maizlish <i>et al.</i> 2013                              | +   |      |                          |
| Michaelowa & Dransfeld 2008                              |     |      | Unknown                  |
| Rabl & de Nazelle 2012                                   |     | +    |                          |
| Rojas-Rueda <i>et al.</i> 2012                           |     | +    |                          |
| Woodcock <i>et al.</i> 2009                              | +   |      |                          |
| Woodcock <i>et al.</i> 2013                              |     | +    |                          |

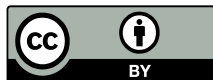

© 2017 by the authors; licensee MDPI, Basel, Switzerland. This article is an open access article distributed under the terms and conditions of the Creative Commons by Attribution (CC-BY) license (<http://creativecommons.org/licenses/by/4.0/>).
